# Supplementary material for: Recommendations for Developing a Telemedicine Strategy for Botswana: A Meta-Synthesis
Source: Preprints.org preprint supplement (doi:10.20944/preprints202307.1048.v1), 2023-07-17
Supplement: Supplementary file 1 [file supplementary]

**Supplementary Table A.** Listing of significant health-related issues (HRI) after independent and collective alignment, combining, and entitling. ('# Sources' represents how many of the six data sources identified an HRI).

| GBD <sup>a</sup>                    |                                                                        | HCW / Patient Opinion <sup>b</sup>                                          | Government of Botswana documents <sup>c</sup> | Botswana tele-medicine literature <sup>d</sup>                       | SDG Target <sup>e</sup> | # Sources |
|-------------------------------------|------------------------------------------------------------------------|-----------------------------------------------------------------------------|-----------------------------------------------|----------------------------------------------------------------------|-------------------------|-----------|
| Morbidity                           | Risk Factors                                                           |                                                                             |                                               |                                                                      |                         |           |
| HIV / AIDS                          | Unsafe sex                                                             |                                                                             | √                                             | HIV / AIDS (delayed CD4 results; dermatological care; antenatal ART) | 3.3, 3.7                | 5         |
| Tuberculosis                        | Tobacco                                                                |                                                                             | √                                             | TB screening / referral                                              | 3.3, 3.9, 3a            | 5         |
| Ischemic heart disease (infarction) | High blood pressure;<br>Tobacco;<br>High body-mass index               |                                                                             | √                                             | Lack of blood pressure screening                                     | 3.4, 3.9, 3a            | 5         |
| Stroke                              | High blood pressure;<br>Tobacco;<br>High body-mass index               |                                                                             | √                                             | Lack of high blood pressure screening                                | 3.4, 3a                 | 5         |
| Diabetes                            | High fasting plasma glucose;<br>High body-mass index;<br>Dietary risks |                                                                             | √                                             | Diabetic retinopathy detection                                       | 3.4                     | 5         |
| Diarrheal diseases                  | WaSH;<br>Malnutrition;<br>Dietary risks                                |                                                                             | √                                             | Monitoring water quality                                             | 3.9, 6,                 | 5         |
| Neonatal disorders                  |                                                                        |                                                                             | √                                             | High child mortality                                                 | 3.2                     | 4         |
| Lower respiratory infection         | Tobacco;<br>Malnutrition;<br>Air pollution                             |                                                                             | √                                             |                                                                      | 3.4, 3.9, 3a            | 4         |
|                                     |                                                                        | Shortage of HCWs;                                                           | √                                             | Shortage of HCWs;<br>Poor access to specialised healthcare           | 3c                      | 4         |
| Road injuries                       | Alcohol use                                                            |                                                                             | √                                             |                                                                      | 3.6                     | 4         |
| Interpersonal violence              | Alcohol use                                                            |                                                                             | √                                             |                                                                      | 3.5, 5.2                | 4         |
|                                     |                                                                        | Prevalence of diseases (TB, blood pressure, cancer, HIV/AIDS, malaria, CVD) | √                                             | Prevalence of TB, HIV, AIDS;<br>Tracking infectious diseases.        | 3.3, 3.4                | 4         |
|                                     |                                                                        | Inefficient / poor referral system                                          | √                                             | HCW information exchange;                                            |                         | 3         |

|  |  |                                                       |   |                                                              |         |   |
|--|--|-------------------------------------------------------|---|--------------------------------------------------------------|---------|---|
|  |  |                                                       |   | Poor access to specialised healthcare                        |         |   |
|  |  | Lack of diagnostic and case management skills         | √ | Poor access to health education.                             |         | 3 |
|  |  | Costs of accessing healthcare facilities and services | √ | ...                                                          | 3.8     | 3 |
|  |  | Lack of medical equipment                             |   | Scarcity of resources                                        | 3.8     | 3 |
|  |  | Loss of patients to follow-up or monitoring           | √ |                                                              |         | 2 |
|  |  | Lack of medical and drug supplies                     |   | ...                                                          | 3.8, 3b | 2 |
|  |  | Delayed reporting of laboratory results               |   | Delayed reporting of CD4 results; LIMS management challenges |         | 2 |
|  |  | Lack of ICT knowledge                                 |   | Access / exchange healthcare information                     |         | 2 |
|  |  | Congestion / over-crowding at healthcare facilities   |   |                                                              |         | 1 |
|  |  | Transport shortages                                   |   |                                                              |         | 1 |
|  |  | Increased patient workloads                           |   |                                                              |         | 1 |
|  |  |                                                       |   | Rehabilitation issues                                        |         | 1 |
|  |  |                                                       |   | Clinical information needs                                   |         | 1 |
|  |  |                                                       |   | Cervical cancer screening.                                   |         | 1 |
|  |  |                                                       |   | Specialist resources (Dermatology, Radiology)                |         | 1 |
|  |  |                                                       |   | eHealth interoperability issues                              |         | 1 |

<sup>a</sup> - sourced from Institute for Health Metrics and Evaluation – Botswana Country Profile (2021) [26]

<sup>b</sup> - sourced from prior research [13]

<sup>c</sup> - sourced from multiple Government of Botswana documents (see text) - √ indicates one or more of the Government documents overtly addressed the specific or closely related HRI

<sup>d</sup> - sourced from multiple documents retrieved from the literature (see text)

<sup>e</sup> - sourced from Botswana domesticated SDG indicators (2018) [28] TB = Tuberculosis

BMI = Body Mass Index

WaSH = Water, Sanitation and Hygiene

CD4 = '*Cluster of Differentiation 4*' lymphocyte count

LIMS = Laboratory Information Management System

HCW = Healthcare Worker

NCD = Non-Communicable Disease

CD = Communicable Disease
